# Supplementary material for: GC–MS Profiling of Naturally Extracted Essential Oils: Antimicrobial and Beverage Preservative Actions
Source: MDPI journal article supplement (doi:10.3390/life12101587), 2022-10-12
Supplement: s1 [file s1]

**Table S1.** Oils were added with volumes as shown in the table based on their MIC results.

| <b>Oil (MIC)</b> | <b><i>S. aureus</i> (1 mL)</b> | <b><i>E. coli</i> (1 mL)</b> | <b><i>C. albicans</i> (1 mL)</b> |
|------------------|--------------------------------|------------------------------|----------------------------------|
| MV               | 50 µL                          | 6.4 µL                       | 12.8 µL                          |
| ML               | 200 µL                         | 0.8 µL                       | 50 µL                            |
| limonene         | 400 µL                         | 6.4 µL                       | 6.4 µL                           |
| 1,8 cineole      | 400 µL                         | 200 µL                       | 200 µL                           |

**Table S2.** Mean readings of colonies count on days 1, 5 and 7.

| <b>Microbe</b>     | <b>Volatile oil</b> | <b>Days count</b>  |                    |                    |
|--------------------|---------------------|--------------------|--------------------|--------------------|
|                    |                     | <b>Day 1 count</b> | <b>Day 5 count</b> | <b>Day 7 count</b> |
| <i>E. coli</i>     | <i>Mentha V.</i>    | 300±10             | 92±7               | < 30               |
|                    | <i>Mentha L.</i>    | 300±20             | 110±15             | < 30               |
|                    | <i>Limonene</i>     | 300±30             | 125±10             | < 30               |
| <i>S. aureus</i>   | <i>Mentha V.</i>    | 300±20             | 80±8               | < 30               |
|                    | <i>Mentha L.</i>    | 300±30             | 150±18             | < 30               |
|                    | <i>Limonene</i>     | 300±30             | 180±20             | < 30               |
| <i>C. albicans</i> | <i>Mentha V.</i>    | 300±10             | 90±8               | < 30               |
|                    | <i>Mentha L.</i>    | 300±15             | 110±10             | < 30               |
|                    | <i>Limonene</i>     | 300±25             | 130±15             | < 30               |

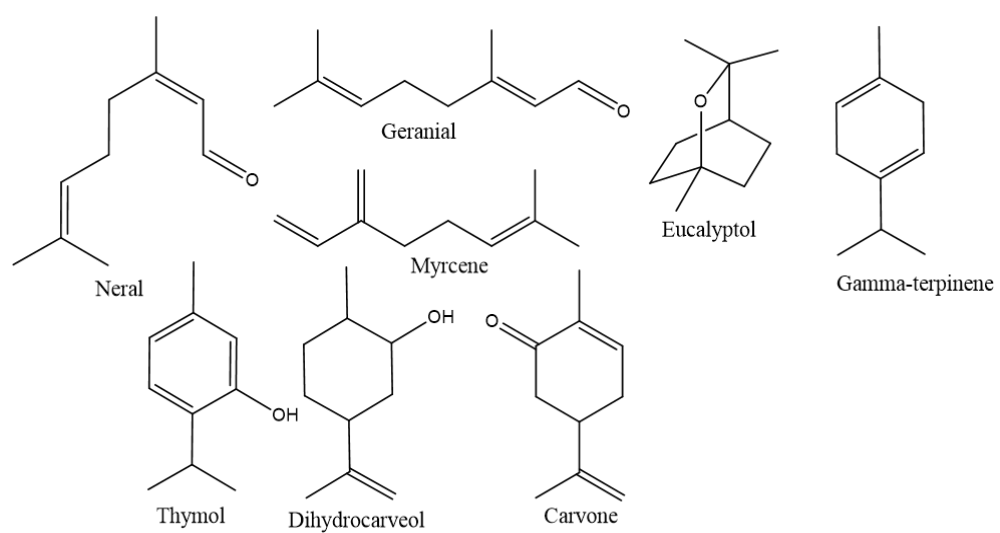

**Figure S1.** Major identified volatiles in herbs of *Cymbopogon citratus*, *Thymus vulgaris* and *Mentha viridis*.
